# Supplementary material for: SET8 inhibition preserves PTEN to attenuate kidney cell apoptosis in cisplatin nephrotoxicity
Source: Springer Nature journal article supplement (doi:10.1038/s41419-025-07526-y), 2025-03-31
Supplement: MOESM1 [file 41419_2025_7526_MOESM1_ESM.pdf]

**Supplementary Table 1. Details of primary antibodies used for immunoblotting analysis**

| Antibody           | Catalogue number | Supplier                                     | Dilution |
|--------------------|------------------|----------------------------------------------|----------|
| SET8               | MA5-14804        | Thermo fisher Scientific (Waltham, MA, USA)  | 1:1000   |
| cleaved-cas3       | 9664             | Cell Signaling Technology (Danvers, MA, USA) | 1:1000   |
| p-p53(ser15)       | 9284             | Cell Signaling Technology (Danvers, MA, USA) | 1:1000   |
| p53                | 2524             | Cell Signaling Technology (Danvers, MA, USA) | 1:1000   |
| Bax                | 2772             | Cell Signaling Technology (Danvers, MA, USA) | 1:1000   |
| Bcl-X <sub>L</sub> | 2764             | Cell Signaling Technology (Danvers, MA, USA) | 1:1000   |
| E-cadherin         | 14472            | Cell Signaling Technology (Danvers, MA, USA) | 1:1000   |
| PTEN               | 9559             | Cell Signaling Technology (Danvers, MA, USA) | 1:1000   |
| p-ERK              | 9101             | Cell Signaling Technology (Danvers, MA, USA) | 1:1000   |
| ERK                | 4695             | Cell Signaling Technology (Danvers, MA, USA) | 1:1000   |
| p-p38              | 4511             | Cell Signaling Technology (Danvers, MA, USA) | 1:1000   |
| p38                | 9212             | Cell Signaling Technology (Danvers, MA, USA) | 1:1000   |
| FOXO1              | 28807            | Cell Signaling Technology (Danvers, MA, USA) | 1:1000   |
| p-H2A              | 9718             | Cell Signaling Technology (Danvers, MA, USA) | 1:1000   |
| H2A                | 7631             | Cell Signaling Technology (Danvers, MA, USA) | 1:1000   |
| p21                | Ab107099         | Abcam (Cambridge, MA, USA)                   | 1:1000   |
| NGAL               | AF857            | R&D systems (Minneapolis, MN, USA)           | 1:1000   |
| Kim-1              | AF1817           | R&D systems (Minneapolis, MN, USA)           | 1:1000   |
| CHMP2A             | 10477-1-AP       | ProteinTech (Rosemont, IL, USA)              | 1:1000   |
| H4K20me1           | sc-134221        | Santa Cruz Biotechnology (Dallas, TX, USA)   | 1:500    |
| Tubulin            | sc-5286          | Santa Cruz Biotechnology (Dallas, TX, USA)   | 1:1000   |
| β-actin            | sc-47778         | Santa Cruz Biotechnology (Dallas, TX, USA)   | 1:1000   |
| GAPDH              | sc-32233         | Santa Cruz Biotechnology (Dallas, TX, USA)   | 1:1000   |
| Histone H4         | 07-108           | Sigma-Aldrich (St. Louis, MO, USA)           | 1:1000   |

**Supplementary Table 2. Details of primary antibodies used for immunofluorescence staining.**

| Antibody | Catalogue number | Supplier                                    | Dilution |
|----------|------------------|---------------------------------------------|----------|
| SET8     | MA5-14804        | Thermo fisher Scientific (Waltham, MA, USA) | 1:200    |
| NGAL     | AF857            | R&D systems (Minneapolis, MN, USA)          | 1:200    |
| PTEN     | 60300-1-Ig       | ProteinTech (Rosemont, IL, USA)             | 1:200    |

**Supplementary table 3. Primers used for Real-Time PCR**

| Gene           | Type           | Sequence (5'-3')        |
|----------------|----------------|-------------------------|
| PTEN           | Forward Primer | TGGATTCGACTTAGACTTGACCT |
|                | Reverse Primer | GCGGTGTCATAATGTCTCTCAG  |
| SET8           | Forward Primer | CAGACCAAACCTGCACGACATC  |
|                | Reverse Primer | CTTGCTTCGGTCCCCATAGT    |
| $\beta$ -Actin | Forward Primer | GGCTGTATTCCCCTCCATCG    |
|                | Reverse Primer | CCAGTTGGTAACAATGCCATGT  |

**Figure S1**

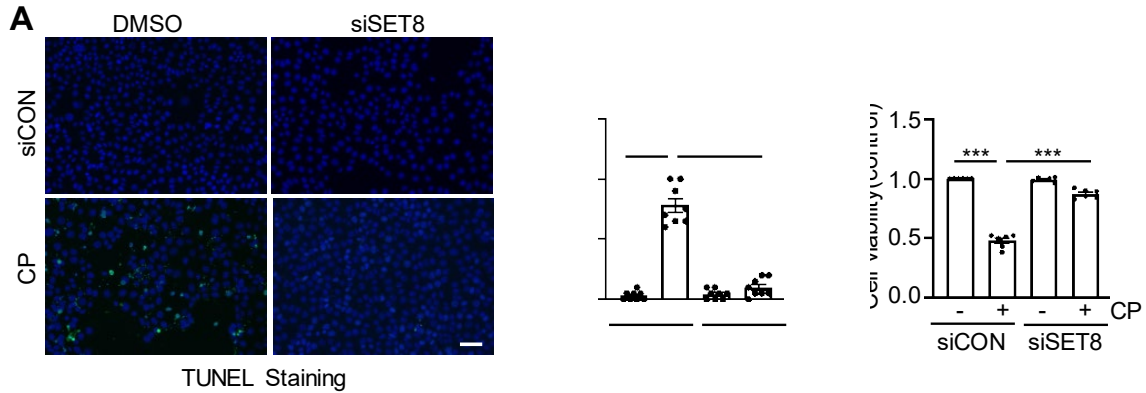

**Supplementary Figure 1. Silencing of SET8 attenuates apoptosis in cultured TKPTs exposed to cisplatin (CP).** Cultured TKPTs were transfected with negative control siRNA (siCON) or specific siRNA for SET8 (siSET8) and then exposed to CP for another 24 hours. (A) TUNEL staining was conducted 24 hours after administering CP, and TUNEL-positive cells were calculated by at least 10 fields per section. Scale bar = 50  $\mu$ m. (C) Cell viability was detected 24 hours later by cell counting kit 8 (CCK8). Data are represented as the mean  $\pm$  SEM of at least three experiments. \*\*\*P<0.001.

**Figure S2**

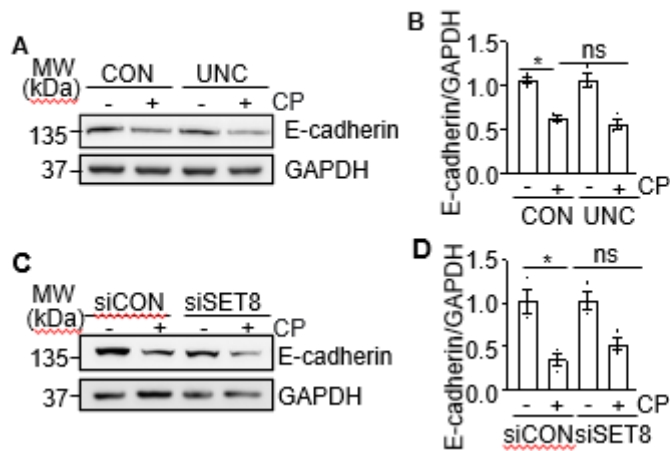

**Supplementary Figure 2. Inhibition of SET8 does not affect cisplatin (CP)-induced downregulation of E-cadherin in cultured TKPTs.** TKPTs were pretreated with UNC0379 for 1 hour (A) or transfected with siRNA targeting SET8 (siSET8) or control siRNA (siCON) (C) for 24 hours and then exposed to CP for 24 hours. The expression level of E-cadherin was quantified by densitometry and normalized by GAPDH (B, D). Data are represented as the mean  $\pm$  SEM of at least three experiments. \* $P < 0.05$ .

**Figure S3**

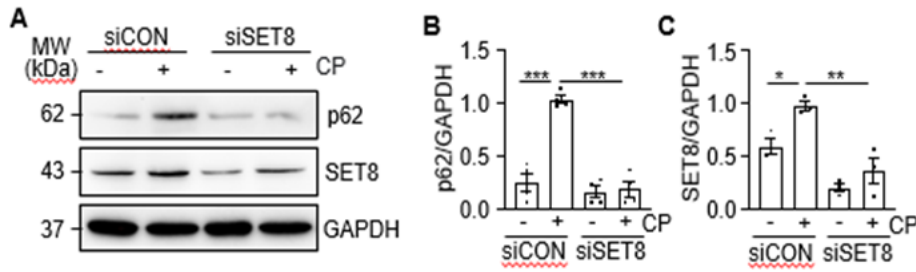

**Supplementary Figure 3. Inhibition of SET8 inhibits CP-induced expression of p62 in**

**cultured TKPTs.** TKPTs were transfected with siRNA targeting SET8 (siPTEN) or control

siRNA (siCON) for 24 hours and then exposed to cisplatin for 24 hours. Cell lysates were

subject to immunoblot analysis using antibodies against p62 or SET8 (A). The expression levels

of p62 (B) and SET8 (C) were quantified by densitometry and normalized by GAPDH. Data are

represented as the mean  $\pm$  SEM of at least three experiments. \*P < 0.05, \*\*P < 0.01, \*\*\*P < 0.001.

**Figure S4**

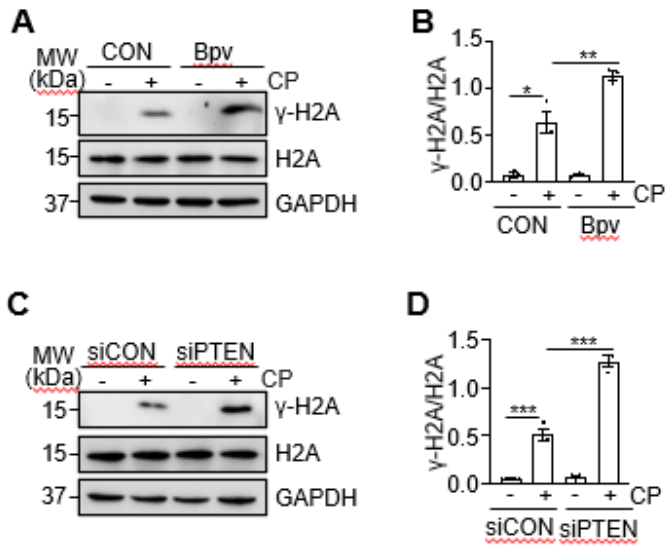

**Supplementary Figure 4. Inhibition of PTEN aggravated cisplatin-induced DNA damage in cultured TKPTs.** TKPTs were pretreated with Bpv for 1 hour (A) or transfected with siRNA targeting PTEN (siPTEN) or control siRNA (siCON) (C) for 24 hours and then exposed to cisplatin for 24 hours. The expression level of γ-H2A was quantified by densitometry and normalized by H2A (B, D). Data are represented as the mean ± SEM of at least three experiments. \*P < 0.05, \*\*P < 0.01, \*\*\*P < 0.001.

**Figure S5**

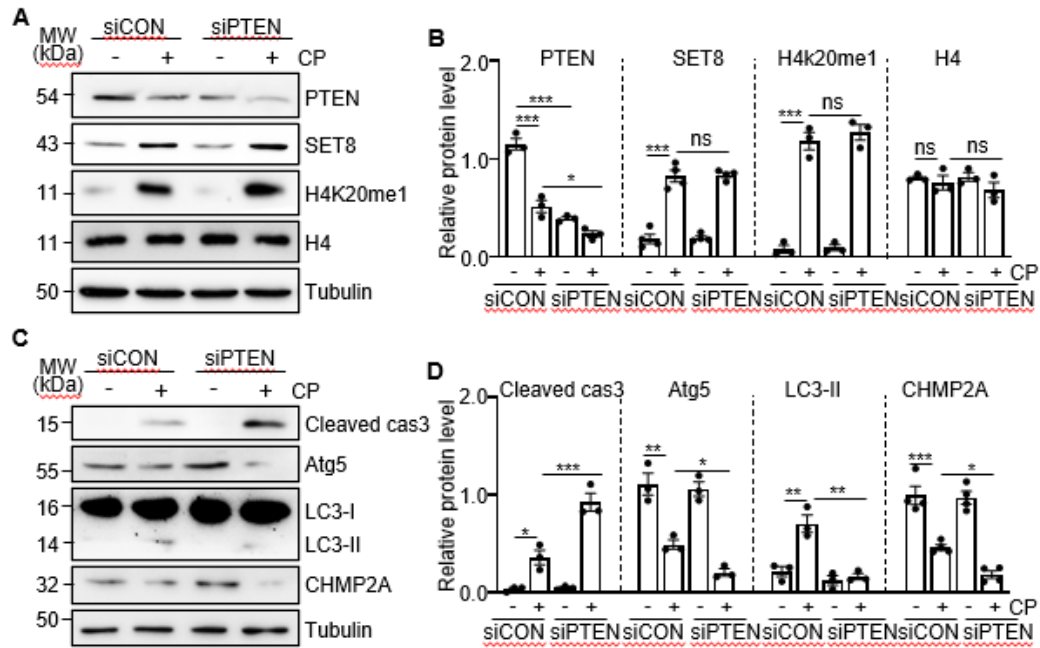

**Supplementary Figure 5. Inhibition of PTEN potentiates cisplatin (CP)-induced impairment of autophagy.** TKPTs were treated with CP for 24 hours after transfection of siRNA targeting PTEN (siPTEN) or control siRNA (siCON) for 24 hours (A-D). Cell lysates were prepared and subjected to immunoblot analysis using antibodies as indicated (A, E). The levels of all the proteins were quantified by densitometry, the expression of PTEN, SET8, H4, cleaved cas-3, Atg5, CHMP2A was normalized with tubulin, and the expression of LC3-II was normalized with LC3-I, respectively (B, D). Data are represented as the mean  $\pm$  SEM of at least three experiments. \*P < 0.05, \*\*P < 0.01, \*\*\*P < 0.001.

**Figure S6**

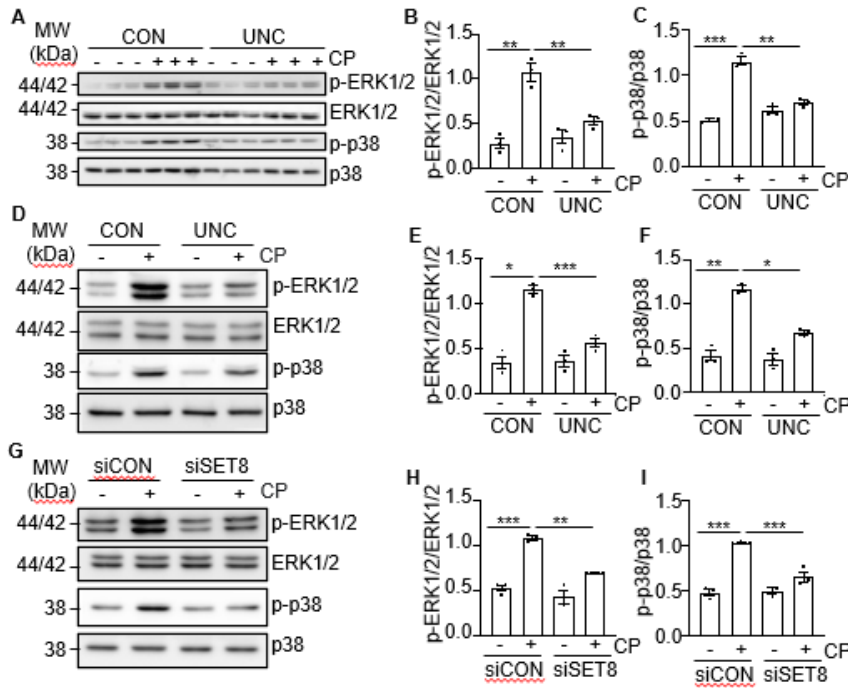

**Supplementary Figure 6. Inhibition of SET8 decreased cisplatin (CP)-induced upregulation of extracellular signal-regulated kinase 1/2 (ERK1/2) and p38 pathways in mice and cultured TKPTs.** (A, D, G) Kidney tissue lysates were subject to immunoblot analysis using antibodies against p-ERK1/2, ERK1/2, p-p38, and p38. The levels of p-ERK1/2 and p-p38 were quantified by densitometry and normalized with ERK1/2 and p38 as indicated (B-C, E-F, H-I). Data are represented as the mean  $\pm$  SEM of at least three experiments. \*P < 0.05, \*\*P < 0.01, \*\*\*P < 0.001.
